# Supplementary material
Source: Springer Nature journal article supplement (https://www.springermedizin.de/resource/supplementary/13014_2012_791_MOESM2_ESM.pdf/9634714)

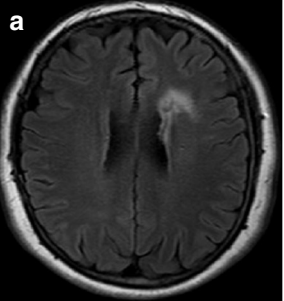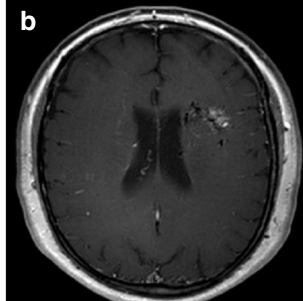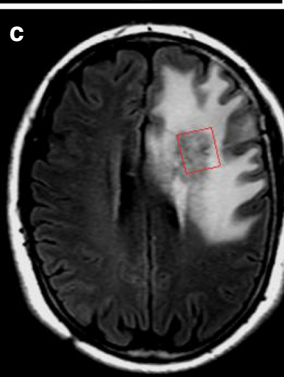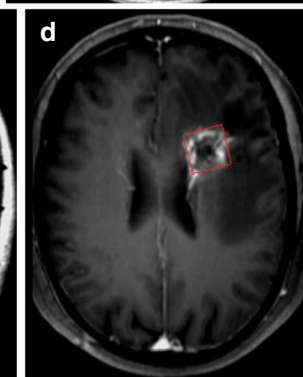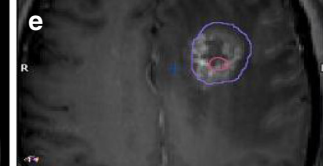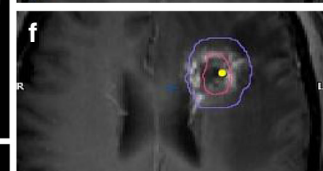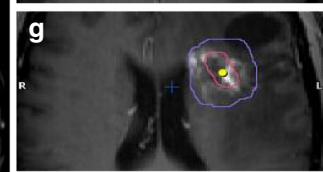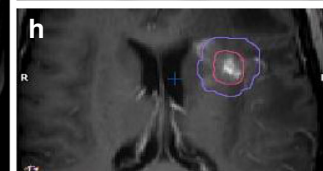

Supplement: MOESM2 [file 9634714]
